# Supplementary material
Source: PubMed Central journal article supplement (PMC5571314)
Supplement: AAC.00310-17_zac009176487s1.pdf [file AAC.00310-17_zac009176487s1.pdf]

**Supplemental table 1: Hits compounds from the screen**

| <b>Compound</b>                           | <b>Action/Use</b>                                     |
|-------------------------------------------|-------------------------------------------------------|
| <b>Quinolone antibiotics</b>              | Inhibit DNA gyrase and DNA replication                |
| Oxolinic acid (47)                        |                                                       |
| Ofloxacin (34)                            |                                                       |
| Flumequine (34)                           |                                                       |
| Lomefloxacin hydrochloride (34)           |                                                       |
| Cinoxacin (34)                            |                                                       |
| Nalidixic acid (34)                       |                                                       |
| <b>Tetracycline antibiotics</b>           | Inhibit protein synthesis                             |
| Tetracycline hydrochloride (12, 48)       |                                                       |
| Meclocycline sulfosalicylate (14, 16, 48) |                                                       |
| Demeclocycline hydrochloride              |                                                       |
| Doxycycline hydrochloride                 |                                                       |
| <b>Other antibiotics</b>                  |                                                       |
| Benzalkonium chloride (3, 49)             | Bacteriocidal which disrupts lipid bilayer            |
| Spectinomycin hydrochloride               | Aminocyclitol antibiotic; binds 30S ribosomal subunit |
| Cefazolin sodium salt                     | Cephalosporin antibiotic (1 <sup>st</sup> generation) |
| Amikacin sulfate                          | Aminoglycoside antibiotic; inhibits 30S ribosomal     |
| Amoxicillin                               | $\beta$ -lactam antibiotic                            |
| Chloramphenicol                           | Protein synthesis inhibitor                           |
| <b>Other compounds</b>                    |                                                       |
| Oxybendazole (5, 50)                      | Used as a veterinary treatment for helminthes         |
| Paroxetine hydrochloride (6, 22, 42)      | Selective serotonin reuptake inhibitor                |

|                                   |                                                |
|-----------------------------------|------------------------------------------------|
| Mefloquine (23, 51)               | Antimalarial drug; synthetic analog of quinine |
| Ethidium bromide (24, 25, 52, 53) | DNA intercalating agent                        |
| Diffunisal (14, 26, 27, 54)       | anti-inflammatory drug; inhibits prostaglandin |
| Acetaminophen (28-30, 55)         | analgesic and antipyretic                      |
| Hydrocortisone                    | Used to treat allergic reactions               |
| Prochlorperazine edisylate        | Phenothiazine class of antipsychotic compounds |
| Quinine sulfate                   | Antimalarial drug                              |
| Ethacrynic acid                   | Loop diuretic                                  |
| Methimazole                       | Thioamide group of antithyroid drugs           |
| Physostigmine                     | Reversible cholinesterase inhibitor            |
| Papaverine hydrochloride          | Opium alkaloid                                 |
| Hydralazine hydrochloride         | Used as a treatment for severe hypertension    |
| Gentian violet                    | Used as a common antiseptic agent              |

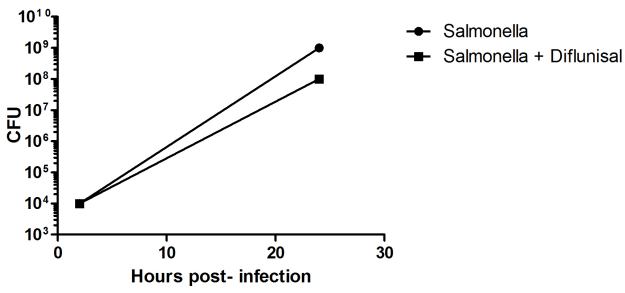

**Supplemental Fig. 1: Diflunisal did not inhibit the intracellular replication of *Salmonella typhimurium* inside macrophage cells**

Macrophage cells were infected with *S. typhimurium* for 2 hours, treated with gentamicin to kill extracellular bacteria, and then co-cultured with 4X MIC of diflunisal for 22 hr. Data shown as cfu of intracellular *S. typhimurium* LVS in macrophages.
